# Supplementary material for: Review of Indications for Endotracheal Intubation in Burn Patients with Suspected Inhalational Injury
Source: Eur Burn J. 2023 Mar 29;4(2):163–72. doi: 10.3390/ebj4020014 (PMC11571857; doi:10.3390/ebj4020014)
Supplement: Supplementary file 1 [file ebj-04-00014-s001.zip › ebj-2242587-supplementary.pdf]

## Supplementary Material

**Table S1.** Abbreviated injury score <sup>13</sup> (AIS) grading scale of inhalation injury on bronchoscopy.

| Grade | Class           | Description                                                                                      |
|-------|-----------------|--------------------------------------------------------------------------------------------------|
| 0     | No injury       | Absence of carbonaceous deposits, erythema, oedema, bronchorrhea, or obstruction                 |
| 1     | Mild injury     | Minor or patchy areas of erythema, carbonaceous deposits, bronchorrhea, or bronchial obstruction |
| 2     | Moderate injury | Moderate degree of erythema, carbonaceous deposits, bronchorrhea or bronchial obstruction        |
| 3     | Severe injury   | Severe inflammation with friability, copious carbonaceous deposits, bronchorrhea, or obstruction |
| 4     | Massive injury  | Evidence of mucosal sloughing, necrosis, endoluminal obstruction                                 |
